# Supplementary material for: UBTF tandem duplications define a distinct subtype of adult de novo acute myeloid leukemia
Source: PubMed Central journal article supplement (PMC10244165; doi:10.1038/s41375-023-01906-z), 2023-04-21
Supplement: 41375_2023_1906_MOESM2_ESM.pdf [file 41375_2023_1906_MOESM2_ESM.pdf]

**Supplementary Table 1: Primers used for *UBTF* screening (from Umeda et al).**

**Supplementary Table 2: Targeted next-generation sequencing panel (154 genes).**

**Supplementary Table 3: Characteristics of the 59 *UBTF* -tandem duplications.** The minimal inserted region common to all but one patient (L120D8419C) is highlighted in red.

**Supplementary Table 4: Clinical data of the 59 patients with *UBTF* -TD-positive AML.**

**Supplementary Table 5: Somatic variations identified by WES and WTS in patient #L220L8879S.** Somatic variations are derived from joint analysis of constitutional and tumor sequence data.

**Supplementary Table 6: Copy number variations (CNVs) identified by WGS in patient #L220L8879S.**

**Supplementary Table 7: Characteristics of *UBTF* -TD AML patients (18-60y) in the different cohorts.** These data refer to only 57 of the 59 patients with *UBTF*-TDs (the 2 patients over 60 years of age were excluded for comparisons).

**Supplementary Table 8: Characteristics of *UBTF* -TD-positive AML patients according to *FLT3* -ITD status.**

**Supplementary Table 1: Primers used for *UBTF* screening (from Umeda et al).**

| Primers      | Sequence 5'-3'                | Amplicon size (bp) |
|--------------|-------------------------------|--------------------|
| UBTF_Forward | CCA AGA AGC CAG CCC AGG AAG G | 617 (wild-type)    |
| UBTF_Reverse | GCC TCT CGG GCC TTG TAC TTG G |                    |

**Supplementary Table 2: Targeted next-generation sequencing panel (154 genes).**

| Gene    | Transcript     | Sequenced region |
|---------|----------------|------------------|
| ABL1    | NM_005157.4    | exons 04-09      |
| ANKRD26 | NM_014915.2    | 5'UTR            |
| ARID1A  | NM_006015.4    | exons 01-20      |
| ASXL1   | NM_015338.5    | exons 11-12      |
| ASXL2   | NM_018263.4    | exons 11-12      |
| ATM     | NM_000051.3    | exons 02-63      |
| ATRX    | NM_000489.4    | exons 01-35      |
| B2M     | NM_004048.2    | exons 01-03      |
| BAX     | NM_138761.3    | exons 01-06      |
| BCL2    | NM_000633.2    | exons 02-03      |
| BCOR    | NM_001123385.1 | exons 02-15      |
| BCORL1  | NM_021946.4    | exons 01-12      |
| BIRC3   | NM_182962.2    | exons 07-10      |
| BRAF    | NM_004333.4    | exons 11,15      |
| BRCA1   | NM_007294.3    | exons 02-24      |
| BRCA2   | NM_000059.3    | exons 02-27      |
| BTK     | NM_000061.2    | exons 02-19      |
| CALR    | NM_004343.3    | exon 09          |
| CARD11  | NM_032415.5    | exons 04-09      |
| CBL     | NM_005188.3    | exons 08-09      |
| CCND1   | NM_053056.2    | exons 01-05      |
| CD274   | NM_001267706.1 | exons 02-07      |
| CD28    | NM_006139.3    | exons 01-04      |
| CD58    | NM_001779.2    | exons 01-06      |
| CD79A   | NM_001783.3    | exons 04-05      |
| CD79B   | NM_000626.3    | exons 05-06      |
| CDKN2A  | NM_058195.3    | exons 01-03      |
| CEBPA   | NM_004364.4    | exon 01          |
| CHEK2   | NM_001005735.1 | exons 02-15      |
| CIITA   | NM_000246.3    | exons 01-19      |
| CREBBP  | NM_004380.2    | exons 01-31      |
| CRLF2   | NM_022148.3    | exon 06          |
| CSF2RA  | NM_001161530.1 | exons 03-14      |
| CSF2RB  | NM_000395.2    | exons 02-14      |
| CSF3R   | NM_156039.3    | exons 14-17      |
| CUX1    | NM_181552.3    | exons 01-24      |
| CXCR4   | NM_003467.2    | exons 01-02      |
| DDX3X   | NM_001356.4    | exons 01-17      |
| DDX41   | NM_016222.3    | exons 01-17      |
| DHX15   | NM_001358.2    | exon 03          |
| DHX34   | NM_014681.5    | exons 02-17      |
| DNMT3A  | NM_022552.4    | exons 02-23      |
| EGLN1   | NM_022051.3    | exons 01-05      |
| EGR2    | NM_000399.4    | exon 02          |

|         |                |                             |
|---------|----------------|-----------------------------|
| EP300   | NM_001429.3    | exons 01-31                 |
| EPAS1   | NM_001430.5    | exon 09,12                  |
| EPO     | NM_000799.4    | exons 01-05                 |
| EPOR    | NM_000121.4    | exon 08                     |
| ETNK1   | NM_018638.4    | exons 01-08                 |
| ETV6    | NM_001987.4    | exons 01-08                 |
| EZH2    | NM_004456.4    | exons 02-20                 |
| FBXW7   | NM_033632.3    | exons 02-12                 |
| FGFR1   | NM_001174067.1 | exons 02-19                 |
| FLT3    | NM_004119.2    | exons 01-24                 |
| FOXO1   | NM_002015.3    | exons 01-02                 |
| GATA1   | NM_002049.3    | exons 02-03                 |
| GATA2   | NM_032638.4    | exons 02-06,c.1017+532_+699 |
| GNA13   | NM_006572.5    | exons 01-04                 |
| GNAS    | NM_000516.5    | exons 08-09                 |
| GNB1    | NM_002074.4    | exons 05-06                 |
| HRAS    | NM_005343.3    | exons 02-04                 |
| ID3     | NM_002167.4    | exons 01-02                 |
| IDH1    | NM_005896.3    | exons 03-10                 |
| IDH2    | NM_002168.3    | exons 01-11                 |
| IKZF1   | NM_006060.5    | exons 02-08                 |
| IL2RG   | NM_000206.2    | exon 08                     |
| IL3RA   | NM_002183.3    | exons 02-12                 |
| IL5RA   | NM_175726.3    | exons 03-12                 |
| IL7R    | NM_002185.3    | exon 06                     |
| IRF4    | NM_002460.3    | exons 02-09                 |
| ITPKB   | NM_002221.3    | exons 02-08                 |
| JAK1    | NM_002227.3    | exons 02-25                 |
| JAK2    | NM_004972.3    | exons 03-25                 |
| JAK3    | NM_000215.3    | exons 02-24                 |
| KDM6A   | NM_001291415.1 | exons 01-30                 |
| KIT     | NM_000222.2    | exons 08-11,17              |
| KLF2    | NM_016270.3    | exons 01-03                 |
| KMT2A   | NM_001197104.1 | exons 01-36                 |
| KMT2D   | NM_003482.3    | exons 02-55                 |
| KRAS    | NM_033360.3    | exons 02-04                 |
| LUC7L2  | NM_001244585.1 | exons 01-11                 |
| MAP2K1  | NM_002755.3    | exons 02-07                 |
| MAP3K14 | NM_003954.4    | exons 02-16                 |
| MBD4    | NM_003925.2    | exons 01-08                 |
| MEF2B   | NM_001145785.1 | exons 02-09                 |
| MPL     | NM_005373.2    | exons 01-12                 |
| MSC     | NM_005098.3    | exon 01                     |
| MYC     | NM_002467.4    | exons 01-03                 |
| MYD88   | NM_002468.4    | exons 01-05                 |
| NF1     | NM_001042492.2 | exons 01-58                 |
| NFE2    | NM_001136023.2 | exons 02-03                 |

|         |                |                |
|---------|----------------|----------------|
| NIPBL   | NM_133433.3    | exons 02-47    |
| NOTCH1  | NM_017617.4    | exons 01-34    |
| NOTCH2  | NM_024408.3    | exons 26-28,34 |
| NPM1    | NM_002520.6    | exons 10-11    |
| NRAS    | NM_002524.4    | exons 02-04    |
| NSD2    | NM_001042424.2 | exons 02-22    |
| PAX5    | NM_016734.2    | exons 01-10    |
| PDGFRA  | NM_006206.5    | exons 02-23    |
| PDGFRB  | NM_002609.3    | exons 02-23    |
| PHF6    | NM_001015877.1 | exons 02-10    |
| PIGA    | NM_002641.3    | exons 02-06    |
| PIM1    | NM_002648.3    | exons 01-06    |
| PLCG1   | NM_002660.2    | exons 01-32    |
| PLCG2   | NM_002661.4    | exons 02-33    |
| PPM1D   | NM_003620.3    | exons 01-06    |
| PRDM1   | NM_001198.3    | exons 01-07    |
| PRPF8   | NM_006445.3    | exons 02-43    |
| PTEN    | NM_000314.6    | exons 01-09    |
| PTPN11  | NM_002834.4    | exons 01-15    |
| PTPRD   | NM_002839.3    | exons 12-46    |
| RAD21   | NM_006265.2    | exons 02-14    |
| RB1     | NM_000321.2    | exons 01-27    |
| RHOA    | NM_001664.3    | exons 02-05    |
| RIT1    | NM_006912.5    | exon 05        |
| RPS15   | NM_001018.4    | exons 03-04    |
| RUNX1   | NM_001754.4    | exons 02-09    |
| SAMD9   | NM_017654.3    | exon 03        |
| SAMD9L  | NM_152703.3    | exon 05        |
| SETBP1  | NM_015559.2    | exons 02-06    |
| SETD2   | NM_014159.6    | exons 01-21    |
| SF3B1   | NM_012433.3    | exons 13-18    |
| SH2B3   | NM_005475.2    | exons 02-08    |
| SMC1A   | NM_006306.3    | exons 01-25    |
| SMC3    | NM_005445.3    | exons 01-29    |
| SOCS1   | NM_003745.1    | exon 02        |
| SPI1    | NM_003120.2    | exons 01-05    |
| SRP72   | NM_006947.3    | exons 01-19    |
| SRSF2   | NM_003016.4    | exon 01        |
| STAG2   | NM_001042749.2 | exons 03-35    |
| STAT1   | NM_007315.3    | exons 03-25    |
| STAT3   | NM_003150.3    | exons 02-24    |
| STAT5A  | NM_003152.3    | exons 03-20    |
| STAT5B  | NM_012448.3    | exons 02-19    |
| STAT6   | NM_003153.4    | exons 08-14    |
| TBL1XR1 | NM_024665.5    | exons 03-16    |
| TCF3    | NM_003200.3    | exons 02-19    |
| TCL1A   | NM_021966.2    | exons 01-03    |

|          |                |             |
|----------|----------------|-------------|
| TERC     | NR_001566.1    | exon 01     |
| TERT     | NM_198253.2    | exons 01-16 |
| TET2     | NM_001127208.2 | exons 03-11 |
| TNFAIP3  | NM_006290.3    | exons 02-09 |
| TNFRSF14 | NM_003820.3    | exons 01-08 |
| TP53     | NM_001126112.2 | exons 02-11 |
| TYK2     | NM_003331.4    | exons 03-25 |
| U2AF1    | NM_006758.2    | exons 02,06 |
| UBA1     | NM_003334.3    | exon 03     |
| UBTF     | NM_014233.3    | exons 10-15 |
| VAV1     | NM_005428.3    | exons 01-27 |
| VHL      | NM_000551.4    | exons 01-03 |
| WT1      | NM_024426.4    | exons 01-10 |
| XPO1     | NM_003400.3    | exons 12-18 |
| ZBTB7A   | NM_015898.3    | exons 02-03 |
| ZRSR2    | NM_005089.3    | exons 01-11 |

**Supplementary Table 3: Characteristics of the 59 UBTF-tandem duplications.** The minimal inserted region common to all but one patient (L120D8419C) is highlighted in red.

| UPN        | Gene(Transcript)   | Mutation (c.hgvs)    | splicing_hypo | Mutation (p.hgvs)   | deleted nucleotides | deleted amino-acid: | inserted nucleotides | inserted amino-acids       | total duplicat |
|------------|--------------------|----------------------|---------------|---------------------|---------------------|---------------------|----------------------|----------------------------|----------------|
| L201B37431 | UBTF (NM_014233.3) | c.1335_1340delins947 | YES           | n.a.                | c.1335_1340del      | W445_D447           | CCTGTCTGAGAAGAAGAAAG | n.a.                       | 941            |
| L220L8879S | UBTF (NM_014233.3) | c.1336_1345delins608 | Confirmed     | p.N446_S449delins52 | c.1336_1345         | N446_S449           | CCAGCAGAAGCTGAGAAGA  | PAEAEKKKGGSEKPKRPVSA MFIS  | 598            |
| L221B25032 | UBTF (NM_014233.3) | c.1509_1510ins573    | YES           | n.a.                | .                   | .                   | CGGTCCAGGGGCTGCAG    | n.a.                       | 573            |
| L115C6385L | UBTF (NM_014233.3) | c.1335_1341delins546 | YES           | n.a.                | c.1335_1341         | W445_D447           | TCTGTCTGAGAAGAAGAAAG | n.a.                       | 539            |
| L115D6160L | UBTF (NM_014233.3) | c.1335_1340delins511 | YES           | n.a.                | c.1335_1340         | W445_D447           | CCTGTCTGAGAAGAAGAAAG | n.a.                       | 505            |
| L115P9195G | UBTF (NM_014233.3) | c.1335_1336ins495    | YES           | n.a.                | .                   | .                   | CCTAGCCTCCCGGGGGCG   | n.a.                       | 495            |
| L180L6707M | UBTF (NM_014233.3) | c.1333_1340delins296 | YES           | n.a.                | c.1333_1340         | W445_D447           | AGCCTGTCTGAGAAGAAGA  | n.a.                       | 288            |
| L201B38060 | UBTF (NM_014233.3) | c.1335_1336ins253    | YES           | n.a.                | .                   | .                   | CCGTGCGAAACCGCCAG    | n.a.                       | 253            |
| L221T6545N | UBTF (NM_014233.3) | c.1334_1335ins174    | no            | p.M444_W445ins58    | .                   | .                   | CCTTGGCGACACCCACGGA  | CLGDTHGPRPSAPGQGGSEKPKRP   | 174            |
| L171D0708G | UBTF (NM_014233.3) | c.1336_1339delins171 | YES           | n.a.                | c.1336_1339         | N446_D447           | CCAGCAGGCCACCTGTCTG  | n.a.                       | 167            |
| L170M6285M | UBTF (NM_014233.3) | c.1335_1336ins144    | no            | p.W445_N446ins48    | .                   | .                   | CTGCAGGAGGAGCGCCTG   | LQEEPELSELPSESELTRLLARM    | 144            |
| L141H1068D | UBTF (NM_014233.3) | c.1336_1341delins150 | no            | p.N446_D447delins50 | c.1336_1341         | N446_D447           | CTGTCTGAGAAGAAGAAGG  | LSEKKKGGSEKPKRPVSA MFIFSEK | 144            |
| L094M3795A | UBTF (NM_014233.3) | c.1336_1341delins144 | no            | p.N446_D447delins48 | c.1336_1341         | N446_D447           | CCAGCAGACAGGCTGTGT   | PADRLLEKPKRPVSA MFIFSEKRR  | 138            |
| L141T1975R | UBTF (NM_014233.3) | c.1336_1339delins114 | YES           | n.a.                | c.1336_1339         | N446_D447           | CCTGCAGGCCACCTGTCTGA | n.a.                       | 110            |
| L221B26162 | UBTF (NM_014233.3) | c.1336_1343delins89  | no            | p.N446_L448delins30 | c.1336_1343         | N446_L448           | CCTTCTGAGAAGAAGAAGG  | PSEKKKVRQLQEEPELSESELTRLL  | 81             |
| L160L6213P | UBTF (NM_014233.3) | c.1336_1337ins81     | no            | p.N446delins28      | .                   | N446                | TTTCTGACGGCCGTTCTCG  | ISDGRSRIRPELSESELTRLLARMW  | 81             |
| L151D4757X | UBTF (NM_014233.3) | c.1336_1337ins69     | no            | p.W445_N446ins23    | .                   | .                   | TAGGTGGGAATCGGCCTGA  | IGGNRPELSESELTRLLARMWIG    | 69             |
| L115E6705G | UBTF (NM_014233.3) | c.1333_1334ins60     | no            | p.M444_W445ins20    | .                   | .                   | CTACATCAGAGCGAGCTGA  | STSERADPPVSELTRLLARM       | 60             |
| L201B38251 | UBTF (NM_014233.3) | c.1297_1299delins63  | no            | p.L432_S433ins20    | c.1297_1299         | .                   | CGCCTAAACCCCTCAGAGA  | RLNPSESELTRLLARMTLNP       | 60             |
| L201B27132 | UBTF (NM_014233.3) | c.1332_1333ins60     | no            | p.M444_W445ins20    | .                   | .                   | ACTCTCCGAGAGCGAGCTG  | TLRERADPSESELTRLLARM       | 60             |
| L221B26192 | UBTF (NM_014233.3) | c.1332_1333ins57     | no            | p.M444_W445ins19    | .                   | .                   | AGAATCGGAGACGATCAG   | RIGDDHETSESELTRLLARM       | 57             |
| L104C7129V | UBTF (NM_014233.3) | c.1308_1309ins54     | no            | p.E436_L437ins18    | .                   | .                   | AGCGAGCTGACCCGCTCG   | SELTRLLARMSLSGSESE         | 54             |
| L120K9245J | UBTF (NM_014233.3) | c.1296_1297delins56  | no            | p.S433_E434ins18    | c.1296_1297         | .                   | TTCGGATCCGAGAGCGAG   | SDPESELTRLLARMWISD         | 54             |
| L221B25151 | UBTF (NM_014233.3) | c.1341_1342ins54     | no            | p.D447_L448ins18    | .                   | .                   | GACGACGACGACGCTCCG   | GGDDVRESELTRLLARMWWD       | 54             |
| L150S1663J | UBTF (NM_014233.3) | c.1335_1340delins60  | no            | p.W445_D447delins21 | c.1335_1340         | W445_D447           | CCTGTCTGAGAAGAAGAAG  | CLSEKKKTEESESELTRLLARMC    | 54             |
| L120B9697S | UBTF (NM_014233.3) | c.1299delins55       | no            | p.S433_E434ins18    | c.1299              | .                   | GGGAGGGGAGAGCGAGCT   | GGSESELTRLLARMSLSGG        | 54             |
| L201B37632 | UBTF (NM_014233.3) | c.1341_1342ins54     | no            | p.D447_L448ins18    | .                   | .                   | TCTGACTCTGAGGTGGCG   | SDSEVAELTRLLARMWWD         | 54             |
| L190D7133S | UBTF (NM_014233.3) | c.1341_1342ins51     | no            | p.D447_L448ins17    | .                   | .                   | GAGCCTGAGATCCGCGAG   | EPEIRELTRLLARMWWD          | 51             |
| L201B26492 | UBTF (NM_014233.3) | c.1333_1334ins51     | no            | p.M444_W445ins17    | .                   | .                   | CCCTCACCTCCGGGAGAT   | SLTSGEIGELTRLLARM          | 51             |
| L221C7407J | UBTF (NM_014233.3) | c.1342_1343ins51     | no            | p.D447_L448ins17    | .                   | .                   | CCCCTGAAGTGAGCGAGCT  | PPEVSELTRLLARMWWD          | 51             |
| L104A9299B | UBTF (NM_014233.3) | c.1334_1341delins59  | no            | p.W445_D447delins20 | c.1334_1341         | W445_D447           | CTCTAAGGGCCTCTGAGCT  | SLRASELSESELTRLLARMS       | 51             |
| L221B26302 | UBTF (NM_014233.3) | c.1342_1343ins51     | no            | p.D447_L448ins17    | .                   | .                   | CCCCGAGATTAGTGAGCT   | PPEISELTRLLARMWWD          | 51             |
| L115T6264J | UBTF (NM_014233.3) | c.1332_1333ins51     | no            | p.M444_W445ins17    | .                   | .                   | GAAATCGATTCCGATCCGA  | EIDSDSESELTRLLARM          | 51             |
| L180V3463P | UBTF (NM_014233.3) | c.1333_1334ins51     | no            | p.M444_W445ins17    | .                   | .                   | CCCTCTCCGAGAGCTCCGAG | SLSESESELTRLLARM           | 51             |
| L150M4373S | UBTF (NM_014233.3) | c.1326_1327ins51     | no            | p.A442_R443ins17    | .                   | .                   | TCTCTCTCTCTCGGAGAG   | SLSLSSESESELTRLLA          | 51             |
| L104D7176G | UBTF (NM_014233.3) | c.1301_1302ins51     | no            | p.S433_E434ins17    | .                   | .                   | CGAGGAGAGCGAGCTGACC  | DEESESELTRLLARMWIDE        | 51             |
| L115B7285F | UBTF (NM_014233.3) | c.1334_1335ins51     | no            | p.M444_W445ins17    | .                   | .                   | CCTAGAAGGGGCGGAGGAC  | CLEGAEEERELTRLLARM         | 51             |
| L211S3057E | UBTF (NM_014233.3) | c.1334_1335ins48     | no            | p.M444_W445ins16    | .                   | .                   | TCTAATCCCCCTGAGAGCG  | CLTPPESELTRLLARM           | 48             |
| L120C9465A | UBTF (NM_014233.3) | c.1333_1334ins48     | no            | p.M444_W445ins16    | .                   | .                   | CCCTTGAGGGCCCTGAGAG  | GLEPPESELTRLLARM           | 48             |
| L200C2697M | UBTF (NM_014233.3) | c.1326_1327ins48     | no            | p.A442_R443ins16    | .                   | .                   | GCGCTCTCGCTCTCCGCTC  | ALSLSGSESELTRLLA           | 48             |
| L201B36941 | UBTF (NM_014233.3) | c.1332_1333ins48     | no            | p.M444_W445ins16    | .                   | .                   | GAGCTGGACCCCTCCGAGA  | ELDPSESELTRLLARM           | 48             |
| L094C1450V | UBTF (NM_014233.3) | c.1343_1344ins48     | no            | p.L448_S449ins16    | .                   | .                   | CGATGTTGACGAGCTGACC  | DVDELTRLLARMWNDL           | 48             |
| L130M5111A | UBTF (NM_014233.3) | c.1333_1334ins48     | no            | p.M444_W445ins16    | .                   | .                   | CCCTAATGCCACGAGAGC   | SLMSHESELTRLLARM           | 48             |
| L104G5833S | UBTF (NM_014233.3) | c.1334_1335ins48     | no            | p.M444_W445ins16    | .                   | .                   | TCTAAGCGAGAGCGAGAGC  | CLSESESELTRLLARM           | 48             |
| L221L1992T | UBTF (NM_014233.3) | c.1333_1334ins48     | no            | p.M444_W445ins16    | .                   | .                   | CGCTCCGAGAGGACGAGAG  | SLREDESELTRLLARM           | 48             |
| L170V9901T | UBTF (NM_014233.3) | c.1332_1333ins48     | no            | p.M444_W445ins16    | .                   | .                   | GAATTGAATGAGAATGAGA  | ELNENESELTRLLARM           | 48             |
| L171M2671A | UBTF (NM_014233.3) | c.1341_1342ins48     | no            | p.D447_L448ins16    | .                   | .                   | GTAGACGCTCGACGAGCTGA | VDVDELTRLLARMWWD           | 48             |
| L120N3834M | UBTF (NM_014233.3) | c.1333_1334ins48     | no            | p.M444_W445ins16    | .                   | .                   | CCCTGCTCTCCGAGAGC    | SLSSSESELTRLLARM           | 48             |
| L130R0357F | UBTF (NM_014233.3) | c.1333_1334ins48     | no            | p.M444_W445ins16    | .                   | .                   | CCTTGACTCTCCGAGAGC   | SLSSSESELTRLLARM           | 48             |

|            |                    |                     |    |                     |             |           |                      |                |              |    |
|------------|--------------------|---------------------|----|---------------------|-------------|-----------|----------------------|----------------|--------------|----|
| L120A2324W | UBTF (NM_014233.3) | c.1334_1335ins48    | no | p.M444_W445ins16    | .           | .         | CCTGGTGACTCCGAGAGCC  | CLGDSSE        | ELTRLLARM    | 48 |
| L160A6655J | UBTF (NM_014233.3) | c.1332_1333ins48    | no | p.M444_W445ins16    | .           | .         | AGTCTAGGGGCAGACGAGA  | SLGADES        | ELTRLLARM    | 48 |
| L220D9480S | UBTF (NM_014233.3) | c.1336_1337ins48    | no | p.W445_N446ins16    | .           | .         | TCAACGACCCCCAGAGCGA  | INDPQSE        | ELTRLLARMW   | 48 |
| L150C3424F | UBTF (NM_014233.3) | c.1333_1334ins48    | no | p.M444_W445ins16    | .           | .         | CCCTCTCGACTCCGAGAGC  | SLSDSESE       | ELTRLLARM    | 48 |
| L130B5842M | UBTF (NM_014233.3) | c.1334_1335ins48    | no | p.M444_W445ins16    | .           | .         | CCTTGATGAGGACGAGAGC  | CLDEDES        | ELTRLLARM    | 48 |
| L160L8204E | UBTF (NM_014233.3) | c.1333_1334ins48    | no | p.M444_W445ins16    | .           | .         | CGCTGAGCTCCTCCGAGAGC | SLSSSESE       | ELTRLLARM    | 48 |
| L201B37942 | UBTF (NM_014233.3) | c.1335_1341delins52 | no | p.W445_D447delins18 | c.1335_1341 | W445_D447 | TCTGTCTGAGCTCTCCGAGA | CLSELSESE      | ELTRLLARMC   | 45 |
| L140D2277H | UBTF (NM_014233.3) | c.1329_1330ins45    | no | p.R443_M444ins15    | .           | .         | CTAACCTTGACGAGGAGAGC | LTLDEESE       | ELTRLLAR     | 45 |
| L120D8419C | UBTF (NM_014233.3) | c.1298_1299ins42    | no | p.S433_E434ins14    | .           | .         | GGGACTATGCCTCCGATTCA | GLCLRFNQLDLQQA |              | 42 |
| L200D5231D | UBTF (NM_014233.3) | c.1334_1348delins54 | no | p.W445_E450delins19 | c.1334_1348 | W445_E450 | CTCTACAGCTCTCCGAGAGC | SLQLSESE       | ELTRLLARMSLQ | 39 |



Supplementary Table 4: Clinical data of the 59 patients with *UBTF*-TD-positive AML.

| UPN        | Cohort    | Age at diagnosis | Age class | Sex | Karyotype                                | WBC (G/L)     | BM blasts (%) | BM cellularity | Morphological subtype | Type of induction    | Response to Induction | MRD positiv |
|------------|-----------|------------------|-----------|-----|------------------------------------------|---------------|---------------|----------------|-----------------------|----------------------|-----------------------|-------------|
| L201B37431 | BIG1      | 32               | ≤60y      | F   | 47,XX,+8[20].NUC ISH(MLLX2)[200]         | 1.5           | 24            | Decreased      | not_available         | CTI                  | CR after induction    | not done    |
| L115C6385L | AML_HDF   | 27               | ≤60y      | F   | 47,XX,+8[3]/46,XX[18]                    | 0.98          | 13            | Decreased      | AML-M6                | CTI                  | CR after salvage      | Yes         |
| L170M6285M | BIG1      | 34               | ≤60y      | M   | Failure (normal by CNV analysis)         | 1.75          | 21            | Decreased      | not_available         | CTI                  | CR after induction    | Yes         |
| L211S3057E | ALFA-PPP  | 24               | ≤60y      | F   | 46,XX[21]                                | 2.78          | 59            | Increased      | AML-MRC               | CTI                  | CR after induction    | not done    |
| L171D0708G | BIG1      | 49               | ≤60y      | M   | 46,XY[20]                                | 1.98          | 22            | Normal         | AML-M6                | CTI                  | CR after salvage      | Yes         |
| L120C9465A | ALFA-0702 | 23               | ≤60y      | M   | 46,XY[20]                                | 93.4          | 73            | Normal         | AML-M2                | CTI                  | salvage failure       | not done    |
| L104C7129V | ALFA-0702 | 29               | ≤60y      | F   | 46,XX[21]                                | 2.0           | 40            | Decreased      | AML-M2                | CTI                  | CR after induction    | Yes         |
| L190D7133S | BIG1      | 38               | ≤60y      | F   | 47,XX,+8[15]                             | 46.7          | 73            | Normal         | AML-M2                | CTI                  | CR after induction    | No          |
| L221L1992T | AML_HDF   | 20               | ≤60y      | M   | 47,XY,+8[18]/46,XY[2]                    | not_available | 22            | not_available  | AML-MRC               | CTI                  | CR after induction    | No          |
| L201B2649Z | BIG1      | 27               | ≤60y      | M   | 46,XY[25]                                | 1.78          | 14            | Increased      | not_available         | CTI                  | CR after salvage      | not done    |
| L201B3694I | BIG1      | 23               | ≤60y      | M   | 47,XY,+8[4]/46,XY[42]                    | 2.5           | 20            | Increased      | not_available         | CTI                  | CR after salvage      | not done    |
| L104A9299B | ALFA-0702 | 37               | ≤60y      | F   | 46,XX[30]                                | 22.7          | 20            | Increased      | AML-M2                | CTI                  | CR after induction    | Yes         |
| L094M3795A | ALFA-0702 | 43               | ≤60y      | M   | 46,XY[25]                                | 37.8          | 70            | Increased      | AML-M2                | CTI                  | salvage failure       | not done    |
| L221B2619Z | BIG1      | 50               | ≤60y      | F   | 46,XX[38]                                | 1.05          | 15            | Increased      | not_available         | CTI                  | CR after salvage      | not done    |
| L221C7407J | ALFA-PPP  | 23               | ≤60y      | F   | 46,XX[21]                                | 6.12          | 22            | Increased      | AML-MRC               | CTI                  | induction failure     | not done    |
| L200C2697M | AML_HDF   | 25               | ≤60y      | M   | 48,XY,+10,+22[5]/49,si,+8[8]             | 55.0          | 90            | Increased      | AML-M1                | CTI                  | CR after induction    | No          |
| L115P9195G | ALFA-0702 | 30               | ≤60y      | M   | 46,XY[20]                                | 15.75         | 38            | Increased      | unclassifiable        | CTI                  | salvage failure       | Yes         |
| L094C1450V | ALFA-0702 | 44               | ≤60y      | F   | 46,XX[20]                                | 8.99          | 25            | Increased      | AML-M6                | CTI                  | CR after induction    | Yes         |
| L130M5111A | ALFA-0702 | 43               | ≤60y      | M   | 46,XY,del(9)(q22q34)[14]/46,XY[1]        | 1.88          | 36            | Normal         | AML-M2                | CTI                  | salvage failure       | Yes         |
| L201B3794Z | BIG1      | 42               | ≤60y      | F   | 47,XX,+8[3]/46,XX[24]                    | 1.32          | 17            | Increased      | not_available         | CTI                  | CR after induction    | not done    |
| L115E6705G | ALFA-0702 | 18               | ≤60y      | M   | 45,X,-Y[6]/46,XY[14]                     | 30.0          | 65            | Increased      | AML-M2                | CTI                  | salvage failure       | Yes         |
| L120K9245J | ALFA-0702 | 22               | ≤60y      | M   | 47,XY,+8[26]/46,XY[4]                    | 29.38         | 94            | Increased      | AML-M2                | CTI                  | CR after induction    | Yes         |
| L104G5833S | ALFA-0702 | 39               | ≤60y      | M   | 46,XY[20]                                | 4.3           | 18            | Increased      | AML-M6                | CTI                  | CR after induction    | No          |
| L180L6707M | BIG1      | 60               | ≤60y      | F   | 47,XX,+8[14]/46,XX[6]                    | 43.27         | 48            | Normal         | not_available         | CTI                  | CR after salvage      | not done    |
| L221B2515I | BIG1      | 49               | ≤60y      | F   | 46,XX[20]                                | 94.28         | 81            | Increased      | not_available         | CTI                  | salvage failure       | not done    |
| L221T6545N | ALFA-PPP  | 45               | ≤60y      | M   | 46,XY[20]                                | 116.0         | 87            | Increased      | AML-M2                | CTI + FLT3 inhibitor | CR after induction    | not done    |
| L220L8879S | ALFA-PPP  | 41               | ≤60y      | M   | 46,XY[20]                                | 2.92          | 33            | Increased      | AML-MRC               | CTI                  | induction failure     | not done    |
| L201B3825I | BIG1      | 48               | ≤60y      | M   | 47,XY,+8[19]/46,XY[1]                    | 23.97         | 94            | Increased      | not_available         | CTI                  | CR after induction    | not done    |
| L200D5231D | AML_HDF   | 20               | ≤60y      | M   | not_available (del(13q) by CNV analysis) | 58.0          | 92            | Increased      | AML-M1                | CTI                  | CR after induction    | not done    |
| L170V9901T | BIG1      | 19               | ≤60y      | M   | 46,XY[21]                                | 65.9          | 88            | Increased      | not_available         | CTI                  | CR after induction    | Yes         |
| L221B2503Z | BIG1      | 40               | ≤60y      | F   | 46,XX[20]                                | 48.2          | 89            | Increased      | not_available         | CTI                  | salvage failure       | not done    |
| L221B2630Z | BIG1      | 36               | ≤60y      | F   | 46,XX[32]                                | 2.08          | 30            | Normal         | not_available         | CTI                  | CR after induction    | not done    |
| L171M2671A | BIG1      | 55               | ≤60y      | F   | 46,XX[25]                                | 1.6           | 21            | Normal         | not_available         | CTI                  | salvage failure       | Yes         |
| L160L6213P | BIG1      | 27               | ≤60y      | M   | 47,XY,+8[3]/46,XY[17]                    | 4.69          | 22            | Decreased      | not_available         | CTI                  | CR after induction    | not done    |
| L120N3834M | ALFA-0702 | 37               | ≤60y      | M   | 46,XY[13]                                | 2.4           | 15            | Increased      | AML-M6                | CTI                  | CR after salvage      | not done    |
| L120D8419C | ALFA-0702 | 23               | ≤60y      | M   | 47,XX,+8[15]                             | 13.76         | 80            | Increased      | AML-M2                | CTI                  | CR after induction    | No          |
| L151D4757X | BIG1      | 22               | ≤60y      | M   | 46,XY[20]                                | 2.83          | 25            | Increased      | AML-M6                | CTI                  | CR after induction    | No          |
| L115T6264J | ALFA-0702 | 19               | ≤60y      | M   | 47,XY,+8[6]/46,XY[15]                    | 1.36          | 10            | Normal         | AML-M6                | CTI                  | CR after salvage      | Yes         |
| L130R0357F | ALFA-0702 | 29               | ≤60y      | M   | 46,XY[26]                                | 26.7          | 26            | Increased      | unclassifiable        | CTI                  | salvage failure       | Yes         |
| L120A2324W | ALFA-0702 | 22               | ≤60y      | M   | 46,XY[20]                                | 2.05          | 23            | Increased      | AML-M6                | CTI                  | CR after induction    | not done    |
| L115B7285F | ALFA-0702 | 44               | ≤60y      | M   | 46,XY[21]                                | 8.97          | 25            | Increased      | AML-M2                | CTI                  | CR after induction    | not done    |
| L160A6655J | BIG1      | 55               | ≤60y      | M   | 46,XY[50]                                | 2.3           | 24            | Normal         | not_available         | CTI                  | CR after induction    | Yes         |
| L220D9480S | ALFA-PPP  | 47               | ≤60y      | M   | not_available (gain(8p) by CNV analysis) | not_available | not_available | not_available  | not_available         | CTI                  | CR after induction    | No          |
| L150C3424F | ALFA-1200 | 61               | >60y      | M   | 46,XY[20]                                | 3.6           | 17            | not_available  | AML-M6                | CTI                  | CR after induction    | No          |
| L104D7176G | ALFA-0702 | 33               | ≤60y      | M   | 46,XY[29]                                | 66.6          | 78            | Increased      | AML-M1                | CTI                  | CR after induction    | Yes         |
| L130B5842M | ALFA-0702 | 55               | ≤60y      | F   | 46,XX[20]                                | 3.6           | 29            | Increased      | AML-M2                | CTI                  | CR after induction    | No          |
| L180V3463P | AML_HDF   | 22               | ≤60y      | M   | 46,XY[20]                                | not_available | 18            | Increased      | AML-M6                | CTI                  | CR after induction    | Yes         |
| L201B3763Z | BIG1      | 52               | ≤60y      | M   | 46,XY[20]                                | 7.4           | 21            | Increased      | not_available         | CTI                  | CR after induction    | not done    |
| L141T1975R | AML_HDF   | 33               | ≤60y      | M   | 46,XY[20]                                | not_available | not_available | Increased      | AML-M6                | CTI                  | salvage failure       | Yes         |
| L150M4373S | AML_HDF   | 56               | ≤60y      | F   | Failure (normal by CNV analysis)         | not_available | not_available | not_available  | AML-M6                | CTI                  | CR after induction    | not done    |
| L150S1663J | ALFA-1200 | 66               | >60y      | M   | 47,XY,+8[12]/46,XY[9]                    | 4.5           | 35            | not_available  | not_available         | CTI                  | salvage failure       | Yes         |
| L115D6160L | ALFA-0702 | 37               | ≤60y      | M   | 46,XY[20]                                | 13.8          | 20            | Normal         | AML-M6                | CTI                  | salvage failure       | Yes         |
| L120B9697S | ALFA-0702 | 28               | ≤60y      | F   | 47,XX,+8[12]/46,XX[3]                    | 2.25          | 20            | Normal         | unclassifiable        | CTI                  | CR after induction    | No          |
| L140D2277H | ALFA-0702 | 37               | ≤60y      | M   | 46,XY[20]                                | 1.2           | 19            | Increased      | AML-M6                | CTI                  | CR after induction    | not done    |
| L221B2616Z | BIG1      | 21               | ≤60y      | F   | 46,XX[28]                                | 1.41          | 28            | Increased      | not_available         | CTI                  | CR after salvage      | not done    |
| L141H1068D | AML_HDF   | 58               | ≤60y      | M   | 47,XY,+8[15]/46,XY[5]                    | 1.0           | 30            | Normal         | AML-M6                | CTI                  | CR after salvage      | Yes         |
| L160L8204E | BIG1      | 22               | ≤60y      | F   | 46,XX[30]                                | 2.2           | 27            | Normal         | not_available         | CTI                  | salvage failure       | not done    |
| L201B3806O | BIG1      | 50               | ≤60y      | M   | 47,XY,+8[13]/46,XY[7]                    | 2.2           | 19            | Normal         | not_available         | CTI                  | CR after induction    | not done    |
| L201B2713Z | BIG1      | 47               | ≤60y      | M   | 46,XY[22]                                | 3.5           | 17            | Increased      | not_available         | CTI                  | CR after induction    | not done    |

**Supplementary Table 5: Somatic variations identified by WES and WTS in patient #L220L8879S.** Somatic variations are derived from joint analysis of constitutional and tumor sequence data.

Variant calling (SNPs and Indels) was performed by Haplotype Caller (GATK4, v4.1.0.0) for WGS and WTS and by Mutect 2 (GATK4, v4.1.4.1) for WES. Variants VAF = allelic frequency; alt = number of reads supporting the mutated sequence; tot = total number of reads supporting the reported position.

| Gene     | Gene name                                       | Location | Ensembl transcript identifier | HGVS nomenclature               | ADN-Tumor VAF (alt/tot) | ARN-Tumor VAF (alt/tot) | CNV status | Cancer gene census list    | Classification                       |
|----------|-------------------------------------------------|----------|-------------------------------|---------------------------------|-------------------------|-------------------------|------------|----------------------------|--------------------------------------|
| UBTF     | upstream binding transcription factor           | 17q21.31 | ENST00000436088.5             | c.1336_1345delins608            | 0.36(114/318)           | 0.53(134/252)           | 2/2        | NA NA                      | Pathogenic                           |
| FLT3     | fms related receptor tyrosine kinase 3          | 13q12.2  | ENST00000241453.11            | c.1781_1782insTCTCAACAGGTGACCGG | 0.17(48/278)            | 0.46(6/13)              | 2/2        | tier 1 oncogene            | Pathogenic                           |
| WT1      | WT1 transcription factor                        | 11p13    | ENST00000332351.7             | c.1385G>A p.(Arg462Gln)         | 0.16(38/242)            | NA(NA)                  | 1/2        | tier 1 oncogene,TSG,fusion | Pathogenic                           |
| GOLGA6L2 | golgin A6 family like 2                         | 15q11.2  | ENST00000312015.6             | c.258+2T>A                      | 0.27(96/355)            | NA(NA)                  | 2/2        | NA NA                      | Likely pathogenic                    |
| GH2      | growth hormone 2                                | 17q23.3  | ENST00000332800.7             | c.456G>A p.(Trp152*)            | 0.31(104/333)           | NA(NA)                  | 2/2        | NA NA                      | Likely pathogenic                    |
| ARMCX2   | armadillo repeat containing X-linked 2          | Xq22.1   | ENST00000328766.9             | c.1118G>C p.(Arg373Pro)         | 0.54(114/210)           | 0.60(3/5)               | 1/1        | NA NA                      | Variant of undetermined significance |
| CMYA5    | cardiomyopathy associated 5                     | 5q14.1   | ENST00000446378.2             | c.383T>Cp.(Val128Ala)           | 0.24(67/275)            | NA(NA)                  | 2/2        | NA NA                      | Variant of undetermined significance |
| CNGA4    | cyclic nucleotide gated channel subunit alpha 4 | 11p15.4  | ENST00000379936.2             | c.1351C>Tp.(Arg451Trp)          | 0.33(83/251)            | NA(NA)                  | 2/2        | NA NA                      | Variant of undetermined significance |
| DIP2A    | disco interacting protein 2 homolog A           | 21q22.3  | ENST00000417564.2             | c.2981G>T p.(Arg994Leu)         | 0.29(81/277)            | 0.37(7/19)              | 2/2        | NA NA                      | Variant of undetermined significance |
| IARS2    | isoleucyl-tRNA synthetase 2, mitochondrial      | 1q41     | ENST00000366922.2             | c.2774C>Gp.(Ser925Cys)          | 0.18(35/191)            | 0.38(30/80)             | 2/2        | NA NA                      | Variant of undetermined significance |
| ZFP28    | ZFP28 zinc finger protein                       | 19q13.43 | ENST00000301318.7             | c.1309G>Tp.(Val437Phe)          | 0.28(59/213)            | NA(NA)                  | 2/2        | NA NA                      | Variant of undetermined significance |

**Supplementary Table 6: Copy number variations (CNVs) identified by WGS in patient #L220L8879S.**

CNVs were detected by Facet (v0.5.14) and WisecondorX (v1.1.5), then annotated by AnnotSV (v2.3.2).

| Chr  | Start_genomic | End_genomic | Size (Mb) | Absolute copy number | Genotype | Status | Gene(s) | Cancer gene census list      |
|------|---------------|-------------|-----------|----------------------|----------|--------|---------|------------------------------|
| [11] | 32364187      | 32596617    | 0.2324    | 1                    | A1/B0    | Loss   | WT1     | tier 1   oncogene,TSG,fusion |

**Supplementary Table 7: Characteristics of UBTF-TD AML patients (18-60y) in the different cohorts.** These data refer to only 57 of the 59 patients with UBTF-TDs (the 2 patients over 60 years of age were excluded for comparisons).

MDS-related genes: *ASXL1*, *BCOR*, *EZH2*, *RUNX1*, *SF3B1*, *SRSF2*, *STAG2*, *U2AF1*, and/or *ZRSR2*

Abbreviations: BM, bone marrow; IQR, interquartile range; MRC, myelodysplastic-related changes; WBC, white blood cell count.

| Parameters                            | UBTF-TD AML<br>ALFA-0702 study | UBTF-TD AML<br>BIG1 study | UBTF-TD AML<br>HDF/PPP cohort | UBTF-TD AML<br>All |
|---------------------------------------|--------------------------------|---------------------------|-------------------------------|--------------------|
| No. of patients                       | 21                             | 23                        | 13                            | 57                 |
| Age, y (IQR)                          | 33 (28-39)                     | 40 (27-49)                | 27 (23-45)                    | 36 (24-45)         |
| WBC, $\times 10^9/L$ (IQR)            | 8.9 (2.3-26.7)                 | 2.3 (1.8-15.7)            | 4.5 (2.3-55.8)                | 3.55 (2-27.4)      |
| BM blasts, % (IQR)                    | 26 (20-65)                     | 24 (20-39)                | 31 (22-80)                    | 25 (20-63)         |
| <b>Cytogenetics</b>                   |                                |                           |                               |                    |
| Normal, n (%)                         | 16/21 (76%)                    | 15/23 (65%)               | 7/13 (54%)                    | 38/57 (67%)        |
| Trisomy 8, n (%)                      | 4/21 (19%)                     | 8/23 (35%)                | 4/13 (31%)                    | 16/57 (28%)        |
| Monosomy 5/del(5q), n (%)             | 0                              | 0                         | 0                             | 0                  |
| Monosomy 7/del(7q), n (%)             | 0                              | 0                         | 0                             | 0                  |
| Monosomy 17/del(17p), n (%)           | 0                              | 0                         | 0                             | 0                  |
| Del(20q), n (%)                       | 0                              | 0                         | 0                             | 0                  |
| Del(12p), n (%)                       | 0                              | 0                         | 0                             | 0                  |
| Complex, n (%)                        | 0                              | 0                         | 0                             | 0                  |
| WT1 mutations, n (%)                  | 15/21 (71%)                    | 12/23 (52%)               | 9/13 (69%)                    | 36/57 (63%)        |
| <b>Signaling mutations</b>            |                                |                           |                               |                    |
| <i>FLT3</i> -ITD, n (%)               | 10/21 (48%)                    | 13/23 (57%)               | 7/13 (54%)                    | 30/57 (53%)        |
| <i>FLT3</i> -TKD, n (%)               | 2/21 (10%)                     | 2/23 (9%)                 | 0                             | 4/57 (7%)          |
| <i>NRAS</i> , n (%)                   | 6/21 (29%)                     | 5/23 (22%)                | 2/13 (15%)                    | 13/57 (23%)        |
| <i>KRAS</i> , n (%)                   | 4/21 (19%)                     | 2/23 (9%)                 | 1/13 (8%)                     | 7/57 (12%)         |
| <i>PTPN11</i> , n (%)                 | 3/21 (14%)                     | 1/23 (4%)                 | 2/13 (15%)                    | 6/57 (11%)         |
| <i>RIT1</i> , n (%)                   | 0                              | 5/23 (22%)                | 1/13 (8%)                     | 6/57 (11%)         |
| <b>DNA-methylation gene mutations</b> |                                |                           |                               |                    |
| <i>DNMT3A</i> , n (%)                 | 2/21 (10%)                     | 1/23 (4%)                 | 0                             | 3/57 (5%)          |
| <i>TET2</i> , n (%)                   | 1/21 (5%)                      | 3/23 (13%)                | 1/13 (8%)                     | 5/57 (9%)          |
| <i>IDH1</i> , n (%)                   | 0                              | 1/23 (4%)                 | 2/13 (15%)                    | 3/57 (5%)          |
| <i>IDH2</i> , n (%)                   | 1/21 (5%)                      | 1/23 (4%)                 | 1/13 (8%)                     | 3/57 (5%)          |
| <i>NPM1</i> mutations, n (%)          | 0                              | 0                         | 0                             | 0                  |
| <i>CEBPA</i> double mutations, n (%)  | 0                              | 0                         | 0                             | 0                  |
| <i>TP53</i> mutations, n (%)          | 0                              | 0                         | 0                             | 0                  |
| MDS-related gene mutations*, n (%)    | 0                              | 2/23 (9%)                 | 3/13 (23%)                    | 5/57 (9%)          |

**Supplementary Table 8: Characteristics of *UBTF*-TD-positive AML patients according to *FLT3*-ITD status.**

Abbreviations: BM, bone marrow; MRC, myelodysplastic-related changes; WBC, white blood cell count,

| Parameters                     | <i>FLT3</i> -ITD negative | <i>FLT3</i> -ITD positive <20% | <i>FLT3</i> -ITD positive ≥ 20% |
|--------------------------------|---------------------------|--------------------------------|---------------------------------|
| WBC, ×10 <sup>9</sup> /L (IQR) | 2.4 (1.6-4.69)            | 2.5 (1.88-7.55)                | 40.53 (25.32-57.25)             |
| BM blasts, % (IQR)             | 22.5 (19-26.75)           | 22 (19.5-32.5)                 | 73 (52.25-89.5)                 |
| BM morphology, n(%)            |                           |                                |                                 |
| Available, n                   | 24                        |                                | 10                              |
| M1/M2, n (%)                   | 6 (25%)                   |                                | 9 (90%)                         |
| M6, n (%)                      | 15 (62%)                  |                                | 0                               |
| MRC, n (%)                     | 3 (13%)                   |                                | 1 (10%)                         |
